# Supplementary material
Source: PubMed Central journal article supplement (PMC3109648)
Supplement: supp_10-2594_Online_Supplement.pdf [file supp_10-2594_Online_Supplement.pdf]

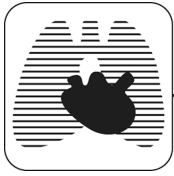

## Neighborhood Poverty Rate and Mortality in Patients Receiving Critical Care in the Academic Medical Center Setting

*Sam Zager, MPhil; Mallika L. Mendu, MD; Domingo Chang, MD; Heidi S. Bazick, MD; Andrea B. Braun, MD; Fiona K. Gibbons, MD; and Kenneth B. Christopher, MD*

### **e-Appendix 1.** ICD-9-CM-Based Classification of Acute Organ Dysfunction Type of Organ Failure and Code Description

#### Respiratory Failure

- 518.81 — Acute respiratory failure
- 518.82 — Acute respiratory distress syndrome
- 518.85 — Acute respiratory distress syndrome after shock or trauma
- 786.09 — Respiratory insufficiency
- 799.1 — Respiratory arrest
- 96.7 — Ventilator management

#### Cardiovascular Failure

- 458.0 — Hypotension, postural
- 785.5 — Shock
- 785.51 — Shock, cardiogenic
- 785.59 — Shock, circulatory or septic
- 458.0 — Hypotension, postural
- 458.8 — Hypotension, specified type, not elsewhere classified
- 458.9 — Hypotension, arterial, constitutional
- 796.3 — Hypotension, transient

#### Renal

- 584 — Acute renal failure
- 580 — Acute glomerulonephritis
- 584.5 — Acute renal failure with lesion of tubular necrosis
- 584.6 — Acute renal failure with lesion of renal cortical necrosis
- 584.7 — Acute renal failure with lesion of renal medullary necrosis
- 584.8 — Acute renal failure with other specified pathological lesion in kidney
- 584.9 — Acute renal failure, unspecified

#### Hepatic

- 570 — Acute hepatic failure or necrosis
- 572.2 — Hepatic encephalopathy
- 573.3 — Hepatitis, septic or unspecified

*Online supplements are not copyedited prior to posting.*



### Hematologic

- 286.2 — Disseminated intravascular coagulation
- 286.6 — Purpura fulminans
- 286.9 — Coagulopathy
- 287.3-5— Thrombocytopenia, primary, secondary, or unspecified

### Metabolic

- 276.2 — Acidosis, metabolic or lactic

### Neurologic

- 293 — Transient organic psychosis
- 348.1 — Anoxic brain injury
- 348.3 — Encephalopathy, acute
- 780.01 — Coma
- 780.09 — Altered consciousness, unspecified

Note: ICD-9-CM denotes International Classification of Diseases, Ninth Revision, Clinical Modification, and CPT Current Procedural Terminology.
